# Supplementary material for: Design and fabrication of flexible DNA polymer cocoons to encapsulate live cells
Source: PubMed Central journal article supplement (PMC6610073; doi:10.1038/s41467-019-10845-2), 2019-07-03
Supplement: 41467_2019_10845_MOESM3_ESM.pdf [file 41467_2019_10845_MOESM3_ESM.pdf]

## Description of Additional Supplementary Files

**File name:** Supplementary Movie 1

**Description:** 3D visualization of the DNA cocoon encapsulated cells. Confocal microscope scanning of the encapsulated MCF-7 cells was performed at a continue z-axis series. The acquired 2-D slice images were stacked together to make a movie over time.
